# Supplementary material for: Y-Chromosome and mtDNA Genetics Reveal Significant Contrasts in Affinities of Modern Middle Eastern Populations with European and African Populations
Source: PLoS One. 2013 Jan 30;8(1):e54616. doi: 10.1371/journal.pone.0054616 (PMC3559847; doi:10.1371/journal.pone.0054616)
Supplement: Table S3 — Y chromosome Haplogroup frequencies of populations used in this study. (XLS) [file pone.0054616.s005.xls]

## Sheet: TableS
TableSxx. Y-chromosome Haplogroup frequencies of populations used in this study
Population	A	B	C	E*	E1b1a	E1b1b1	F*	G	H	I	J2	K*	R1*	R1a1	R1b	R2
Burkinabe	0.00597015	0.0567164	0	0.0895522	0.814925	0.0208955	0	0	0	0	0	0	0	0	0.0119403	0
Cypriot	0	0	0	0	0	0.380952	0.214286	0.0238095	0	0	0.285714	0.0714286	0	0	0.0238095	0
Egyptian	0	0	0	0	0	0.509091	0.236364	0.0727273	0	0	0.0909091	0.0636364	0	0.0272727	0	0
Ethiopian	0.142857	0.0102041	0	0.326531	0.0102041	0.377551	0.0510204	0	0	0	0.0204082	0.0612245	0	0	0	0
Jordanian	0.00760456	0.00380228	0	0	0.00760456	0.231939	0.357414	0.0570342	0	0.0114068	0.144487	0.0570342	0	0.0304183	0.0912548	0
Kenyan	0.202247	0.0561798	0	0.123596	0.325843	0.258427	0	0	0	0	0	0.0337079	0	0	0	0
Lebanese	0	0	0	0.00658436	0.00493827	0.167901	0.192593	0.072428	0	0.0329218	0.299588	0.119342	0	0.0205761	0.0814815	0.00164609
Libyan	0	0	0	0	0.05	0.55	0.225	0.05	0	0	0.05	0.05	0	0	0.025	0
Moroccan	0	0	0	0	0.078125	0.835938	0.0625	0.0117188	0	0	0.00390625	0.0078125	0	0	0	0
Palestinian	0	0	0	0	0	0.253823	0.360856	0.058104	0	0.0275229	0.207951	0.0183486	0	0.00917431	0.0642202	0
Saudi	0	0	0	0	0.0526316	0.0947368	0.631579	0.0210526	0	0	0.105263	0.0736842	0	0	0.0210526	0
Slovak	0	0	0.00841751	0	0.0016835	0.0656566	0.013468	0.0454545	0.0319865	0.252525	0.0286195	0.040404	0	0.372054	0.139731	0
Southeastern European	0	0	0.00501253	0.00250627	0	0.175439	0.0075188	0.047619	0.0075188	0.24812	0.195489	0.0200501	0.00250627	0.115288	0.172932	0
Syrian	0.00578035	0	0	0.00385356	0.0115607	0.119461	0.337187	0.0520231	0	0.0211946	0.22158	0.125241	0.00578035	0.0520231	0.044316	0
Tunisian	0	0	0	0	0	0.822581	0	0	0	0	0.0806452	0.0967742	0	0	0	0
Turk	0.00408163	0	0.0142857	0.00408163	0.00204082	0.104082	0.0897959	0.110204	0.00612245	0.0571429	0.242857	0.126531	0.00408163	0.0673469	0.157143	0.0102041
Western European	0	0	0	0	0	0.185185	0.135802	0.0740741	0	0.0740741	0.123457	0.0432099	0	0.00617284	0.358025	0
Yemeni	0	0	0.0114943	0	0.0229885	0.103448	0.655172	0.0229885	0	0.0114943	0.103448	0	0	0.0229885	0.045977	0
