# Supplementary material for: Y-Chromosome and mtDNA Genetics Reveal Significant Contrasts in Affinities of Modern Middle Eastern Populations with European and African Populations
Source: PLoS One. 2013 Jan 30;8(1):e54616. doi: 10.1371/journal.pone.0054616 (PMC3559847; doi:10.1371/journal.pone.0054616)
Supplement: Table S5 — List of HVS-I mtDNA SNPs identified across populations used in this study. (XLS) [file pone.0054616.s007.xls]

## Sheet: TableS4
Table S4. List of HVS-I mtDNA SNPs identified across populations used in this study. List of 185 SNPs across populations in the range 16090 and 16365 representing the most informative common set of HVS-I markers reported.
SNP Count = 185
16091
16092
16093
16094
16096
16102
16104
16108
16109
16111
16112
16114
16117
16124
16126
16129
16131
16132
16133
16134
16136
16137
16138
16139
16140
16141
16142
16144
16145
16146
16147
16148
16150
16152
16153
16154
16157
16158
16161
16162
16164
16165
16167
16168
16169
16170
16172
16173
16174
16176
16177
16178
16179
16181
16182
16184
16185
16186
16187
16188
16189
16191
16192
16194
16195
16197
16201
16203
16206
16207
16209
16212
16213
16214
16215
16216
16217
16218
16219
16220
16221
16222
16223
16224
16225
16227
16228
16229
16230
16231
16232
16233
16234
16235
16239
16240
16241
16242
16243
16244
16245
16246
16247
16248
16249
16250
16251
16252
16254
16255
16256
16257
16258
16259
16260
16261
16262
16263
16264
16265
16266
16267
16269
16270
16271
16272
16274
16275
16278
16280
16284
16286
16287
16288
16289
16290
16291
16292
16293
16294
16295
16296
16297
16298
16299
16300
16301
16302
16303
16304
16305
16309
16310
16311
16312
16313
16316
16317
16318
16319
16320
16324
16326
16327
16328
16329
16330
16335
16336
16340
16342
16343
16344
16345
16346
16352
16353
16354
16355
16356
16357
16359
16360
16362
16365
