# Supplementary material for: Y-Chromosome and mtDNA Genetics Reveal Significant Contrasts in Affinities of Modern Middle Eastern Populations with European and African Populations
Source: PLoS One. 2013 Jan 30;8(1):e54616. doi: 10.1371/journal.pone.0054616 (PMC3559847; doi:10.1371/journal.pone.0054616)
Supplement: Table S6 — Fisher exact tests for haplogroup frequencies vs. population across all study populations. (XLS) [file pone.0054616.s008.xls]

## Sheet: Table S5
Y Chromosome and mtDNA genetics reveal significant contrasts in affinities of modern Middle Eastern populations with European and African populations Danielle A Badro1, Bouchra Douaihy1,†, Marc Haber1,2,†, Sonia C Youhanna1, Angélique Salloum1, Michella Ghassibe-Sabbagh1, Brian Johnsrud3, Georges Khazen1, Elizabeth Matisoo-Smith4, David F Soria-Hernanz2,5, R Spencer Wells5, Chris Tyler-Smith6, Da…
Table S5: Fisher exact tests for haplogroup frequencies vs. population across all study populations
	A	D	H	HV	I	J	J1	JT	K	L0	L1	L2	L3	L4	L5	L6	L7	M	N	N1	R	R0	T	U	V	W	X
Balkans	---	---	3.306e-11 >	0.1203 >	0.1286 >	0.3906 >	---	---	0.385 <	---	---	---	---	---	---	---	---	0.00471 <	---	0.006762 <	0.2514 <	0.0001566 <	0.3378 >	0.03308 >	---	0.05882 >	0.007454 >
Burkina-Faso	---	---	0.3293 <	---	---	---	---	---	---	---	---	1.027e-09 >	0.5931 <	0.1841 >	---	---	---	0.0002718 >	---	---	---	---	---	---	3.78e-08 >	---	---
Cyprus	---	---	0.238 <	---	0.1274 >	0.2081 <	---	---	8.863e-07 >	---	0.08015 >	---	---	---	---	---	---	0.5161 <	---	0.3569 <	0.1953 >	---	0.4381 >	0.0699 >	---	0.08888 >	0.1414 >
Egypt	---	---	3.959e-26 <	0.1286 >	0.02956 >	0.08523 <	---	0.2426 >	0.1769 <	0.359 >	0.06381 >	0.5202 <	1.73e-05 >	---	---	---	---	0.001742 >	0.0004801 >	0.4963 >	3.024e-06 >	1.366e-12 >	0.212 >	0.09028 <	---	0.2708 <	0.5106 <
Ethiopia	---	---	1.137e-29 <	0.08871 <	---	3.512e-06 <	---	---	0.000223 <	3.615e-07 >	0.1756 >	2.904e-12 >	9.347e-12 >	6.443e-21 >	---	0.1771 >	---	4.361e-14 >	---	0.3825 <	---	0.00029 >	0.001364 <	0.0004595 <	---	0.3916 <	0.2545 <
Iraq	---	---	0.0422 <	0.02697 >	---	0.008404 >	---	---	0.3857 >	---	---	---	---	---	---	---	---	0.4964 <	---	---	0.09647 >	0.5669 >	0.38 >	0.02988 >	---	---	---
Jordan	---	---	0.4357 <	0.06351 >	0.522 <	0.3157 <	---	---	0.05096 <	0.1123 <	0.1082 <	0.1401 <	0.4935 >	---	---	---	---	0.03515 <	0.3093 >	0.01177 >	0.1941 <	0.05138 <	0.2692 >	5.168e-05 >	0.09413 <	0.5454 >	0.5212 >
Kenya	---	---	---	---	---	0.001796 <	---	---	---	2.168e-22 >	8.595e-05 >	0.001117 >	1.215e-24 >	---	---	---	---	0.2976 >	---	---	---	0.0417 <	---	0.0003422 <	---	---	---
Lebanon	---	---	0.00456 >	7.135e-07 >	0.06426 >	0.4314 <	---	0.04792 >	2.641e-05 >	---	---	3.4e-12 <	2.084e-12 <	---	---	---	---	4.066e-06 <	0.4724 <	0.01507 >	0.3228 <	0.2002 <	0.001266 >	0.292 >	0.1466 <	0.2027 >	0.3624 <
Libya	---	---	0.5776 <	---	0.3796 >	0.197 <	---	---	---	---	---	0.6866 <	0.0002098 >	---	---	---	---	---	---	---	---	0.5201 >	0.4291 >	0.5314 <	0.007234 >	---	---
Libyan Sahara	---	---	1.545e-16 >	---	---	---	---	---	---	0.001736 >	0.0242 >	8.702e-05 >	0.006758 >	---	---	---	---	0.1969 <	---	---	---	---	---	---	0.02869 >	---	---
Mali	---	---	0.01169 >	---	---	---	---	---	---	---	0.02909 >	0.007083 >	---	---	---	---	---	0.00434 >	---	---	---	---	---	---	---	---	---
Morocco	---	---	0.1917 <	0.04669 <	---	0.1313 <	---	---	0.1365 >	---	9.812e-07 >	0.001819 >	0.01159 >	0.5051 >	---	---	---	0.01411 >	---	0.1048 <	0.5853 <	0.1931 <	0.01274 <	0.1112 <	0.0004379 >	---	0.6043 <
Niger	---	---	0.003865 <	---	---	---	---	---	---	0.3574 >	0.0002552 >	0.0002585 >	4.994e-05 >	---	---	---	---	0.567 >	---	---	---	---	---	0.1938 <	0.004299 >	---	---
Palestinian	---	---	0.3515 <	0.04547 >	0.4318 <	0.0396 >	---	---	0.2415 <	---	---	0.2986 >	0.07826 <	---	---	---	---	0.5603 >	0.07802 >	0.1529 <	---	0.5378 >	0.05088 >	0.3468 <	---	0.5183 <	0.04751 >
Saudi Arabia	---	---	8.972e-29 <	9.596e-08 <	0.1343 <	1.531e-18 >	---	---	0.01746 <	0.1535 <	0.07369 <	0.4331 <	0.009034 <	0.2268 <	---	0.4552 <	---	2.995e-06 >	0.3647 <	5.668e-09 >	0.01999 <	3.542e-28 >	0.07949 <	0.3263 <	---	0.4052 <	0.02907 >
Slovakia	---	---	5.348e-10 >	0.4369 <	0.00106 >	0.4249 <	---	---	0.001212 <	---	---	0.01655 <	---	---	---	---	---	0.03603 <	---	0.0237 <	---	---	0.07082 >	0.05639 >	---	0.05048 >	0.5776 <
Syria	---	---	0.1985 <	0.05779 >	0.2903 <	0.1687 >	---	0.2045 >	0.00717 >	---	---	0.4957 <	0.01789 <	---	---	---	---	0.01633 <	0.6 >	0.09849 >	0.08639 >	0.01841 <	0.03984 >	0.3228 <	0.6278 <	0.0112 >	0.5315 >
Tunisia	---	---	0.1277 >	0.3037 >	---	6.776e-05 <	---	---	0.00227 <	0.2238 <	6.227e-07 >	1.778e-06 >	3.503e-05 >	---	---	---	---	0.2218 <	---	---	---	---	0.1015 <	0.1134 >	0.3635 >	---	0.2517 <
Western Europe	---	---	5.94e-38 >	0.1815 <	0.289 >	0.0279 <	---	---	0.002428 >	---	0.0004713 <	1.376e-12 <	1.105e-20 <	---	---	---	---	5.048e-13 <	0.2412 >	3.098e-06 <	0.4081 >	2.155e-19 <	0.1239 >	0.003135 >	2.702e-05 >	0.3628 <	0.1258 <
Yemen	---	---	4.093e-25 <	0.03148 <	---	0.008429 >	---	---	0.5144 <	2.749e-12 >	0.5426 >	0.03277 >	7.537e-12 >	0.06145 >	---	2.276e-15 >	---	0.03641 >	---	0.03437 >	0.01084 >	0.006583 >	0.02849 <	0.0002362 <	---	0.224 <	0.4417 <
