# Supplementary material for: Y-Chromosome and mtDNA Genetics Reveal Significant Contrasts in Affinities of Modern Middle Eastern Populations with European and African Populations
Source: PLoS One. 2013 Jan 30;8(1):e54616. doi: 10.1371/journal.pone.0054616 (PMC3559847; doi:10.1371/journal.pone.0054616)
Supplement: Table S7 — Fisher exact tests for haplogroup frequencies vs. population within the Middle East. (XLS) [file pone.0054616.s009.xls]

## Sheet: TableS6
Table S6: Fisher exact tests for haplogroup frequencies vs. population within the Middle East.
	A	D	H	HV	I	J	JT	K	L0	L1	L2	L3	L4	L5	L6	L7	M	N	N1	R	R0	T	U	V	W	X
Iraq	---	---	0.224 <	0.05684 >	---	0.06618 >	---	0.4743 >	---	---	---	---	---	---	---	---	0.5338 <	---	---	0.0917 >	0.3989 <	0.4795 >	0.03368 >	---	---	---
Jordan	---	---	0.01211 >	0.2201 >	---	0.007274 <	---	0.01407 <	0.2276 <	0.627 >	0.5518 <	0.1198 >	---	---	---	---	0.04907 <	0.2803 >	0.364 >	0.1956 <	0.0006909 <	0.4988 >	5.377e-05 >	0.5453 <	0.5699 <	0.5336 <
Lebanon	---	---	1.368e-19 >	8.416e-05 >	---	4.886e-06 <	---	0.0003399 >	---	---	2.691e-08 <	5.695e-09 <	---	---	---	---	2.862e-06 <	0.5188 <	0.07773 <	0.3238 <	6.792e-06 <	0.01993 >	0.3807 >	0.02464 >	0.3339 >	0.1359 <
Palestinian	---	---	0.1634 >	0.1165 >	---	0.3229 >	---	0.1493 <	---	---	0.08033 >	0.2172 <	---	---	---	---	0.5045 >	0.06656 >	0.02013 <	---	0.231 <	0.1068 >	0.3121 <	---	0.4597 <	0.07322 >
Saudi Arabia	---	---	1.358e-17 <	1.499e-10 <	---	8.852e-10 >	---	0.001471 <	0.3712 <	0.2408 >	0.07039 >	0.1636 <	---	---	---	---	2.9e-08 >	0.3869 <	0.001581 >	0.01724 <	4.759e-19 >	0.009188 <	0.244 <	---	0.279 <	0.06593 >
Syria	---	---	0.1139 >	0.1844 >	---	0.2733 <	---	0.02349 >	---	---	0.2224 >	0.108 <	---	---	---	---	0.02254 <	0.5831 >	0.4865 <	0.07435 >	0.0002961 <	0.1113 >	0.2742 <	0.1117 >	0.01719 >	0.5578 <
Yemen	---	---	3.035e-17 <	0.004457 <	---	0.3736 >	---	0.2993 <	3.588e-18 >	0.009778 >	0.0002775 >	1.118e-18 >	---	---	---	---	0.01645 >	---	0.544 >	0.006947 >	0.2278 >	0.005346 <	9.474e-05 <	---	0.158 <	0.3134 <
