# Supplementary material for: Y-Chromosome and mtDNA Genetics Reveal Significant Contrasts in Affinities of Modern Middle Eastern Populations with European and African Populations
Source: PLoS One. 2013 Jan 30;8(1):e54616. doi: 10.1371/journal.pone.0054616 (PMC3559847; doi:10.1371/journal.pone.0054616)
Supplement: Table S8 — mtDNA FST distances between populations. (XLS) [file pone.0054616.s010.xls]

## Sheet: Table S7
Y Chromosome and mtDNA genetics reveal significant contrasts in affinities of modern Middle Eastern populations with European and African populations Danielle A Badro1, Bouchra Douaihy1,†, Marc Haber1,2,†, Sonia C Youhanna1, Angélique Salloum1, Michella Ghassibe-Sabbagh1, Brian Johnsrud3, Georges Khazen1, Elizabeth Matisoo-Smith4, David F Soria-Hernanz2,5, R Spencer Wells5, Chris Tyler-Smith6, Da…
Table S7: mtDNA FST distances between populations (adjusted so off-diagonals are slightly positive -- 0.000001)
	Balkans	Burkina-Faso	Cyprus	Egypt	Ethiopia	Iraq	Jordan	Kenya	Lebanon	Libya	LibyanSahara	Mali	Morocco	Niger	Palestinian	SaudiArabia	Slovakia	Syria	Tunisia	WesternEurope	Yemen
Balkans	0	0.13389	0.0204	0.02523	0.12288	0.01609	0.00606	0.27255	0.0036	0.01535	0.02899	0.10969	0.03376	0.1817	0.0114	0.03575	0.00162	0.00474	0.03776	0.00212	0.05041
Burkina-Faso	0.13389	0	0.10166	0.05056	0.0357	0.14232	0.09287	0.10495	0.133	0.05977	0.0846	0.01776	0.04651	0.02355	0.1034	0.09961	0.13317	0.11219	0.03821	0.16438	0.05812
Cyprus	0.0204	0.10166	0	0.01509	0.07375	0.02748	0.01404	0.17553	0.01402	0.01668	0.03808	0.06515	0.02133	0.12138	0.02729	0.04214	0.02983	0.01077	0.03124	0.02587	0.03175
Egypt	0.02523	0.05056	0.01509	0	0.04177	0.03153	0.01015	0.14237	0.02461	1e-06	0.01966	0.0261	0.00847	0.06734	0.0198	0.02704	0.02563	0.01732	0.01124	0.04213	0.01343
Ethiopia	0.12288	0.0357	0.07375	0.04177	0	0.09648	0.08438	0.03965	0.13099	0.04423	0.0763	0.00937	0.04295	0.01115	0.08911	0.07771	0.11499	0.09608	0.04728	0.16705	0.02993
Iraq	0.01609	0.14232	0.02748	0.03153	0.09648	0	0.01035	0.20599	0.00883	0.02503	0.07053	0.10401	0.04375	0.1544	0.00289	0.00815	0.02	0.00699	0.05284	0.0268	0.03709
Jordan	0.00606	0.09287	0.01404	0.01015	0.08438	0.01035	0	0.20742	0.00456	1e-06	0.02363	0.06992	0.02108	0.12005	0.00525	0.01976	0.0089	0.00209	0.02213	0.01513	0.0265
Kenya	0.27255	0.10495	0.17553	0.14237	0.03965	0.20599	0.20742	0	0.28171	0.13999	0.1819	0.07123	0.13927	0.04272	0.20596	0.19068	0.25713	0.23053	0.13687	0.33171	0.10393
Lebanon	0.0036	0.133	0.01402	0.02461	0.13099	0.00883	0.00456	0.28171	0	0.01303	0.03749	0.10668	0.03571	0.178	0.00895	0.02977	0.01004	0.00097	0.04376	0.00783	0.04744
Libya	0.01535	0.05977	0.01668	1e-06	0.04423	0.02503	1e-06	0.13999	0.01303	0	0.02334	0.05545	0.00456	0.06842	0.00597	0.01593	0.02041	0.00521	0.00252	0.02983	0.00742
LibyanSahara	0.02899	0.0846	0.03808	0.01966	0.0763	0.07053	0.02363	0.1819	0.03749	0.02334	0	0.06639	0.0197	0.1191	0.03902	0.05894	0.03099	0.03539	0.01196	0.03871	0.03606
Mali	0.10969	0.01776	0.06515	0.0261	0.00937	0.10401	0.06992	0.07123	0.10668	0.05545	0.06639	0	0.01481	0.01944	0.08182	0.07225	0.11006	0.08852	0.02286	0.14227	0.0337
Morocco	0.03376	0.04651	0.02133	0.00847	0.04295	0.04375	0.02108	0.13927	0.03571	0.00456	0.0197	0.01481	0	0.0549	0.02952	0.03645	0.03727	0.02577	0.00465	0.04941	0.01741
Niger	0.1817	0.02355	0.12138	0.06734	0.01115	0.1544	0.12005	0.04272	0.178	0.06842	0.1191	0.01944	0.0549	0	0.12394	0.10689	0.18163	0.14435	0.04689	0.22444	0.04503
Palestinian	0.0114	0.1034	0.02729	0.0198	0.08911	0.00289	0.00525	0.20596	0.00895	0.00597	0.03902	0.08182	0.02952	0.12394	0	0.01174	0.01301	0.00492	0.03035	0.0226	0.03078
SaudiArabia	0.03575	0.09961	0.04214	0.02704	0.07771	0.00815	0.01976	0.19068	0.02977	0.01593	0.05894	0.07225	0.03645	0.10689	0.01174	0	0.03569	0.02084	0.04415	0.05442	0.02162
Slovakia	0.00162	0.13317	0.02983	0.02563	0.11499	0.02	0.0089	0.25713	0.01004	0.02041	0.03099	0.11006	0.03727	0.18163	0.01301	0.03569	0	0.01082	0.03657	0.00463	0.05164
Syria	0.00474	0.11219	0.01077	0.01732	0.09608	0.00699	0.00209	0.23053	0.00097	0.00521	0.03539	0.08852	0.02577	0.14435	0.00492	0.02084	0.01082	0	0.03051	0.01136	0.03195
Tunisia	0.03776	0.03821	0.03124	0.01124	0.04728	0.05284	0.02213	0.13687	0.04376	0.00252	0.01196	0.02286	0.00465	0.04689	0.03035	0.04415	0.03657	0.03051	0	0.05436	0.0218
WesternEurope	0.00212	0.16438	0.02587	0.04213	0.16705	0.0268	0.01513	0.33171	0.00783	0.02983	0.03871	0.14227	0.04941	0.22444	0.0226	0.05442	0.00463	0.01136	0.05436	0	0.07431
Yemen	0.05041	0.05812	0.03175	0.01343	0.02993	0.03709	0.0265	0.10393	0.04744	0.00742	0.03606	0.0337	0.01741	0.04503	0.03078	0.02162	0.05164	0.03195	0.0218	0.07431	0
